# Supplementary material for: Genetic and phenotypic characterization of Parkinson’s disease at the clinic-wide level
Source: PubMed Central journal article supplement (PMC11068880; doi:10.1038/s41531-024-00690-6), 2024-05-03
Supplement: 41531_2024_690_MOESM1_ESM.pdf [file 41531_2024_690_MOESM1_ESM.pdf]

1 Supplement for “Genetic and phenotypic characterization of Parkinson’s disease at the clinic-  
 2 wide level” by Tropea et al. prepared for *NPJ Parkinson’s Disease*.  
 3  
 4

5 **Supplementary Table 1. *GBA1* and *LRRK2* variants included in testing.**  
 6

|        | Target Gene  | Coding     | Protein      | rs ID       | GnomAD frequency | MIND frequency |
|--------|--------------|------------|--------------|-------------|------------------|----------------|
|        | <i>LRRK2</i> | c.6055G>A  | p.Gly2019Ser | rs34637584  | 0.000488         | 0.014123       |
|        | <i>LRRK2</i> | c.7153G>A  | p.Gly2385Arg | rs34778348  | 0.001680         | 0.000901       |
|        | <i>LRRK2</i> | c.4309A>C  | p.Asn1437His | rs74163686  | Absent           | Absent         |
|        | <i>LRRK2</i> | c.4321C>G  | p.Arg1441Gly | rs33939927  | 0.000004         | Absent         |
|        | <i>LRRK2</i> | c.4321C>T  | p.Arg1441Cys | rs33939927  | 0.000012         | Absent         |
|        | <i>LRRK2</i> | c.4322G>A  | p.Arg1441His | rs34995376  | 0.000032         | Absent         |
|        | <i>LRRK2</i> | c.5096A>G  | p.Tyr1699Cys | rs35801418  | Absent           | Absent         |
|        | <i>LRRK2</i> | c.6059T>C  | p.Ile2020Thr | rs35870237  | Absent           | Absent         |
| Risk   | <i>GBA1</i>  | c.1093G>A  | p.Glu365Lys  | rs2230288   | 0.010730         | 0.016526       |
|        | <i>GBA1</i>  | c.1223C>T  | p.Thr408Met  | rs75548401  | 0.006124         | 0.01262        |
| Mild   | <i>GBA1</i>  | c.1226A>G  | p.Asn409Ser  | rs76763715  | 0.002235         | 0.012921       |
|        | <i>GBA1</i>  | c.1604G>A  | p.Arg535His  | rs75822236  | 0.000169         | 0.000601       |
|        | <i>GBA1</i>  | c.1304A>C  | p.Asn435Thr  | rs75385858  | Absent           | Absent         |
|        | <i>GBA1</i>  | c.1342G>C  | p.Asp448His  | rs1064651   | 0.000135         | 0.001202       |
| Severe | <i>GBA1</i>  | c.1448T>C  | p.Leu483Pro  | rs421016    | 0.001226         | 0.003606       |
|        | <i>GBA1</i>  | c.882T>G   | p.His294Gln  | rs367968666 | 0.000219         | 0.000901       |
|        | <i>GBA1</i>  | c.115+1G>A |              | rs104886460 | 0.000071         | 0.000601       |
|        | <i>GBA1</i>  | c.887G>A   | p.Arg296Gln  | rs78973108  | 0.000035         | 0.0003         |
|        | <i>GBA1</i>  | c.1504C>T  | p.Arg502Cys  | rs80356771  | 0.000067         | 0.0003         |
|        | <i>GBA1</i>  | c.475C>T   | p.Arg159Trp  | rs439898    | Absent           | Absent         |
|        | <i>GBA1</i>  | c.680A>G   | p.Asn227Ser  | rs364897    | 0.000074         | Absent         |
|        | <i>GBA1</i>  | c.1297G>T  | p.Val433Leu  | rs80356769  | 0.000032         | Absent         |

7  
 8 1 case identified as RecNcil (comprised of variants: p.L483P, p.A495P, and p.Val499=)  
 9  
 10

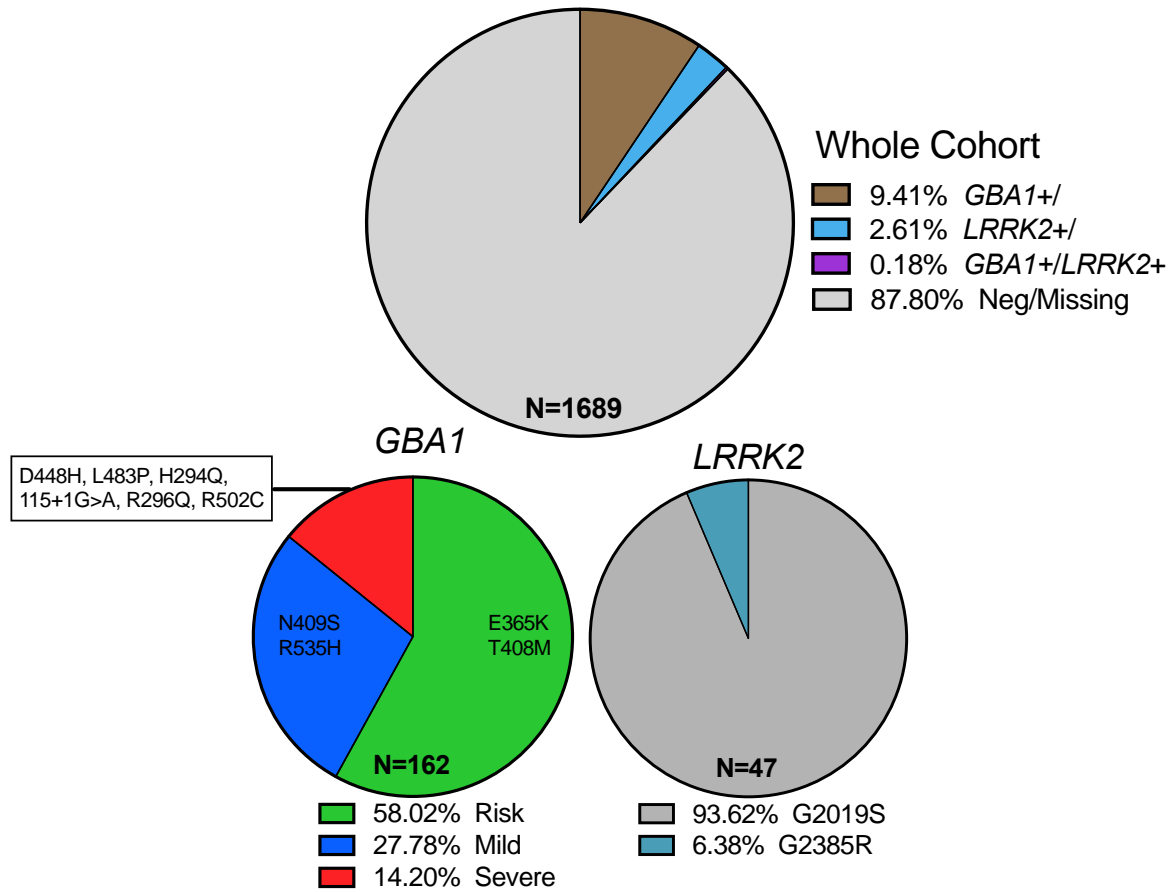

1  
2  
3  
4

**Supplemental Figure 1.** GBA1 and LRRK2 testing results in the Molecular Integration in Neurological Diagnosis Initiative Parkinson’s Disease Cohort.

1 **Supplemental Table 2. *GBA1* and *LRRK2* Testing Results.**  
 2

| Target Gene  | Variant                                           | N (HET/HOM) |
|--------------|---------------------------------------------------|-------------|
| <i>LRRK2</i> | G2019S                                            | 41/3        |
|              | G2385R                                            | 3/0         |
| <i>GBA1</i>  | E365K                                             | 53/1        |
|              | T408M                                             | 40/1        |
|              | N409S                                             | 41/1        |
|              | R535H                                             | 2/0         |
|              | D448H                                             | 4/0         |
|              | L483P                                             | 12/0        |
|              | H294Q                                             | 3/0         |
|              | 115+1G>A                                          | 2/0         |
|              | R296Q                                             | 1/0         |
|              | R502C                                             | 1/0         |
| Complex      | <i>GBA1</i> Rec1                                  | 1/0         |
|              | <i>LRRK2</i> G2019S HET/<br><i>GBA1</i> N409S HET | 2           |
|              | <i>LRRK2</i> G2019S HOM/<br><i>GBA1</i> N409S HET | 1           |
|              | <i>GBA1</i> H294Q HET/<br><i>GBA1</i> D448H HET   | 1           |

3  
4

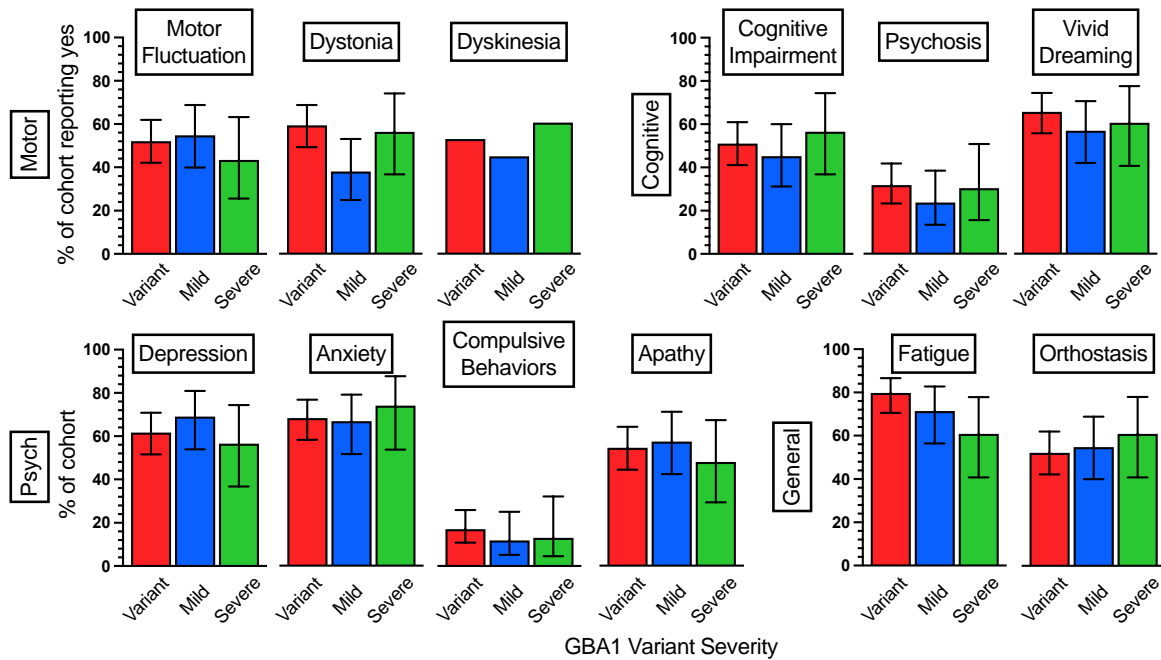

1  
2 **Supplemental Figure 2. Motor and Non-Motor Parkinson's Disease Symptoms by GBA1**  
3 **Variant Severity.** Responses groups as ever (currently or in the past) or never experiencing a  
4 symptom. Heterozygote and homozygote carriers are combined. Error bars represent 95%CI.  
5

```

1  R Code
2  #Loading Packages
3  library(readxl)
4  library(kableExtra)
5  library(vtable)
6  library(epiDisplay)
7  library(psych)
8  library(crosstable)
9  library(gmodels)
10
11  ###Summary statistics for the whole cohort
12  ###Data for Table 1 and Figure 2 (frequency of motor and non-motor symptoms)
13  sumtable(MINDFinal)
14  tab1(MINDFinal$Race)
15  sumtable(MINDFinal[MINDFinal$GBAYN == 0 & MINDFinal$LRRK2YN == 0, ])
16  tab1(MINDFinal[MINDFinal$GBAYN == 0 & MINDFinal$LRRK2YN == 0, ]$Race)
17  sumtable(MINDFinal[MINDFinal$GBAYN == 1 & MINDFinal$LRRK2YN == 0, ])
18  tab1(MINDFinal[MINDFinal$GBAYN == 1 & MINDFinal$LRRK2YN == 0, ]$Race)
19  sumtable(MINDFinal[MINDFinal$GBAYN == 0 & MINDFinal$LRRK2YN == 1, ])
20  tab1(MINDFinal[MINDFinal$GBAYN == 0 & MINDFinal$LRRK2YN == 1, ]$Race)
21
22  ###gene group comparisons
23  ###GBA
24  sumtable(MINDGBA)
25  table(MINDGBA$GBAYN, MINDGBA$Sex)
26  fisher.test(table(MINDGBA$GBAYN, MINDGBA$Sex))
27  table(MINDGBA$GBAYN, MINDGBA$Ethnicity)
28  table(MINDGBA$GBAYN, MINDGBA$Race)
29  describeBy(MINDGBA$AgeEnrollment, group=MINDGBA$GBAYN)
30  table(MINDGBA$GBAYN, MINDGBA$Onset)
31  kruskal.test(MINDGBA$AgeDiag, MINDGBA$GBAYN)
32  kruskal.test(MINDGBA$AgeEnrollment, MINDGBA$GBAYN)
33  fisher.test(table(MINDGBA$GBAYN, MINDGBA$Onset))
34  fisher.test(table(MINDGBA$GBAYN, MINDGBA$FHSum))
35
36  #LRRK2
37  sumtable(MINDLRRK2)
38  table(MINDLRRK2$LRRK2YN, MINDLRRK2$Sex)
39  fisher.test(table(MINDLRRK2$LRRK2YN, MINDLRRK2$Sex))
40  table(MINDLRRK2$LRRK2YN, MINDLRRK2$Ethnicity)
41  table(MINDLRRK2$LRRK2YN, MINDLRRK2$Race)
42  describeBy(MINDLRRK2$AgeEnrollment, group=MINDLRRK2$LRRK2YN)
43  table(MINDLRRK2$LRRK2YN, MINDLRRK2$Onset)
44  table(MINDLRRK2$LRRK2YN, MINDLRRK2$FHSum)
45  kruskal.test(MINDLRRK2$AgeDiag, MINDLRRK2$LRRK2YN)
46  kruskal.test(MINDLRRK2$AgeEnrollment, MINDLRRK2$LRRK2YN)
47  fisher.test(table(MINDLRRK2$LRRK2YN, MINDLRRK2$Onset))
48  fisher.test(table(MINDLRRK2$LRRK2YN, MINDLRRK2$FHSum))
49
50  ##p-value correction Table 1
51  #Sex

```

```

1 Sexgenepvalues = c(0.08123, 0.02407)
2 p.adjust(Sexgenepvalues, method = "BH")
3
4 #Age Diagnosis
5 GBADEMAGEpvalues = c(0.1077,0.3473)
6 p.adjust(GBADEMAGEpvalues, method = "BH")
7
8 #Age Enrollment
9 GBADEMenrollpvalues = c(0.02493,0.6828)
10 p.adjust(GBADEMenrollpvalues, method = "BH")
11
12 #Clinical Presentation
13 GBADEMPresentpvalues = c(0.4821,0.4158)
14 p.adjust(GBADEMPresentpvalues, method = "BH")
15
16 #1st degree fam
17 GBADEMFHpvalues = c(0.2258,0.00107)
18 p.adjust(GBADEMFHpvalues, method = "BH")
19
20
21 ###summary of clinical features
22 ###yes or no with comparisons
23 ###Sex
24 crosstable(MINDFinal, c(Dyskinesia1, Dystonia1, MotorFluc1, CognitiveImpair1,
25 CompulsiveBehav1, Depression1, Lightheaded1, Anxiety1, Fatigue1, Psychosis1,
26 DecreasedMot1, VivdDreaming1), test = TRUE, effect = TRUE, by = Sex01) %>%
27 as_flextable(keep_id=TRUE)
28
29 ###Sex-corrected pvalues
30 Sexpvalues = c(0.3232, 0.0034, 0.9887, 0.0003, 0.2111, 0.0254, 0.0341, 0.0002, 0.4032,
31 0.9756, 0.5116, 0.0040)
32 print("Sex")
33 p.adjust(Sexpvalues, method = "BH")
34
35 ###GBA
36 crosstable(MINDGBA, c(Dyskinesia1, Dystonia1, MotorFluc1, CognitiveImpair1,
37 CompulsiveBehav1, Depression1, Lightheaded1, Anxiety1, Fatigue1, Psychosis1,
38 DecreasedMot1, VivdDreaming1), test = TRUE, effect = TRUE, by = GBAYN) %>%
39 as_flextable(keep_id=TRUE)
40
41 ###GBA-corrected pvalues
42 GBApvalues = c(0.0529, 0.1556, 0.7982, 0.2553, 0.9666, 0.000033, 0.3559, 0.0060, 0.1004,
43 0.0135, 0.0537, 0.1708)
44 p.adjust(GBApvalues, method = "BH")
45
46
47 #GBASev
48 crosstable(MINDGBASev, c(Dyskinesia1, Dystonia1, MotorFluc1, CognitiveImpair1,
49 CompulsiveBehav1, Depression1, Lightheaded1, Anxiety1, Fatigue1, Psychosis1,
50 DecreasedMot1, VivdDreaming1), test = TRUE, effect = TRUE, by = GBASev) %>%
51 as_flextable(keep_id=TRUE)

```

```

1
2 ###GBA-corrected pvalues
3 GBApvalues = c(0.0529, 0.1556, 0.7982, 0.2553, 0.9666, 0.000033, 0.3559, 0.0060, 0.1004,
4 0.0135, 0.0537, 0.1708)
5 p.adjust(GBApvalues, method = "BH")
6
7 ###LRRK2
8 crosstable(MINDLRRK2, c(Dyskinesia1, Dystonia1, MotorFluc1, CognitiveImpair1,
9 CompulsiveBehav1, Depression1, Lightheaded1, Anxiety1, Fatigue1, Psychosis1,
10 DecreasedMot1, VivdDreaming1), test = TRUE, effect = TRUE, by = LRRK2YN) %>%
11 as_flextable(keep_id=TRUE)
12
13 ###LRRK2-corrected pvalues
14 LRRK2pvalues = c(0.2862, 0.1306, 0.8173, 0.0706, 0.0256, 0.3801, 0.0697, 0.5110, 0.4933,
15 0.4095, 0.4150, 0.0141)
16 print("LRRK2")
17 p.adjust(LRRK2pvalues, method = "BH")
18
19 ###adjusted pvalues
20 GBApvalues = c(0.054, 0.157, 0.803, 0.277, 1, 0, 0.36, 0.007, 0.105, 0.015, 0.055, 0.17)
21 print("GBA")
22 p.adjust(GBApvalues, method = "BH")
23
24 LRRK2pvalues = c(0.356, 0.168, 0.879, 0.09, 0.033, 0.443, 0.091, 0.539, 0.297, 0.572, 0.445,
25 0.02)
26 print("LRRK2")
27 p.adjust(LRRK2pvalues, method = "BH")
28
29 Sexpvalues = c(0.333, 0.004, 1, 0, 0.231, 0.026, 0.033, 0, 0.411, 0.951, 0.542,0.004)
30 print("Sex")
31 p.adjust(Sexpvalues, method = "BH")
32
33 MedSexpvalues = c(0.006, 0.078, 0.562, 0.262, 0.305, 0.346, 0.00000556, 0.359, 0.291, 0.041)
34 print("Meds.Sex")
35 p.adjust(MedSexpvalues, method = "BH")
36
37 MedGBApvalues = c(0.087, 0.189, 0.701, 0.217, 0.525, 1, 0.066, 0.259, 0.354, 0.385)
38 print("Meds.GBA")
39 p.adjust(MedGBApvalues, method = "BH")
40
41 MedLRRK2pvalues = c(0.513, 0.234, 0.279, 1, 0.343, 0.256, 0.175, 1, 0.009, 0.819)
42 print("Meds.LRRK2")
43 p.adjust(MedLRRK2pvalues, method = "BH")
44
45
46
47
48

```
